# Supplementary material for: Impact of Topographic Wind Conditions on Dust Particle Size Distribution: Insights from a Regional Dust Reanalysis Dataset
Source: Copernicus journal article supplement (doi:10.5194/egusphere-2024-3076), 2024-12-17
Supplement: Supplementary file 1 [file egusphere-2024-3076-supplement.pdf]

*Supplement of*

# **Impact of Topographic Wind Conditions on Dust Particle Size Distribution: Insights from a Regional Dust Reanalysis Dataset**

Xinyue Huang<sup>1</sup>, Wenyu Gao<sup>2</sup>, Hosein Foroutan<sup>1</sup>

<sup>1</sup>Department of Civil and Environmental Engineering, Virginia Tech, Blacksburg, Virginia, USA

<sup>2</sup>Department of Mathematics and Statistics, University of North Carolina at Charlotte, Charlotte, North Carolina, USA

*Correspondence to:* Hosein Foroutan (hosein@vt.edu)

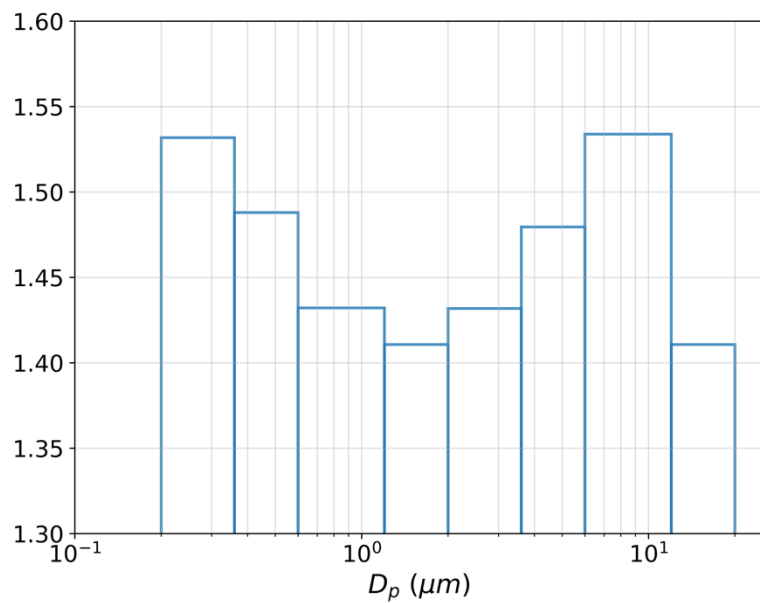

**Figure S1.** Ratio of first-guess dust concentration to its reanalysis across eight size bins. The average of dust concentrations in grids that contain any portion of selected Fennec segments were used as an example (see Section 2.2 for more details).

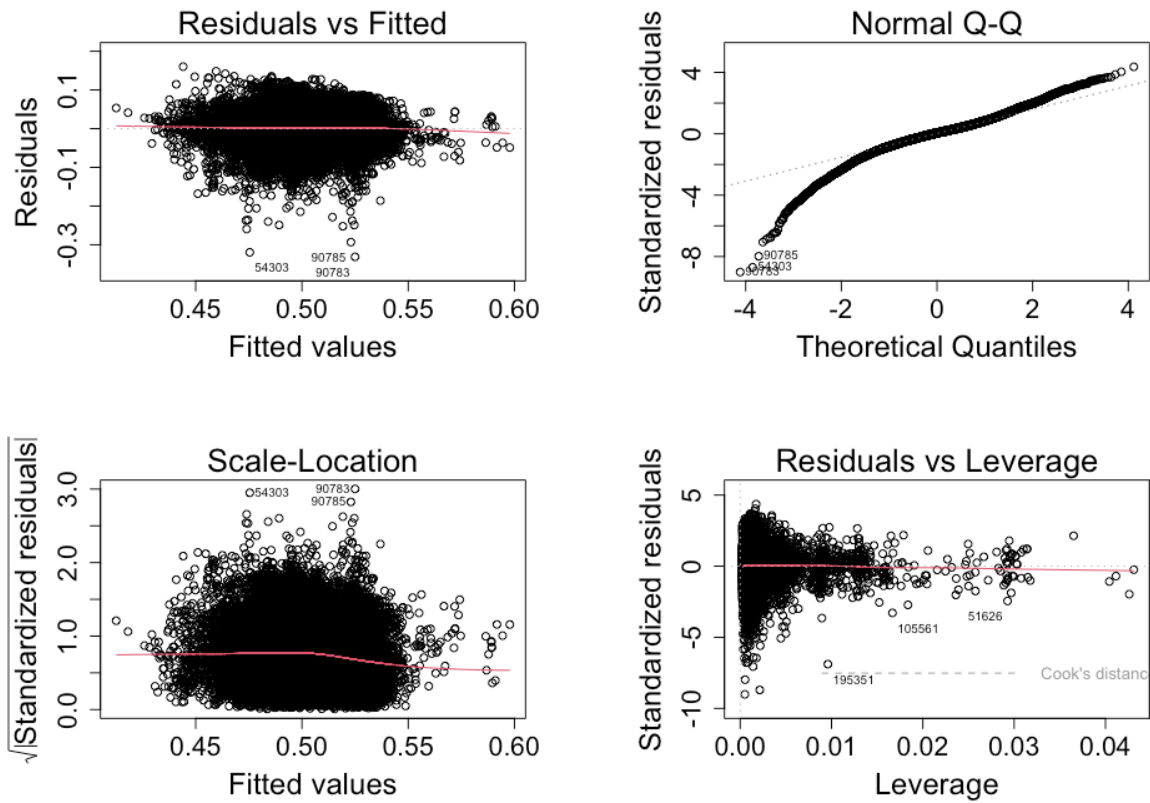

**Figure S2.** Diagnostic plots for the residuals of the linear model with only significant interactions (Eq. (4)). The “Residual vs Fitted” and “Scale-Location” panels indicate that the residuals exhibit uneven variances. The “Normal Q-Q” panel shows the deviation of data points from the dotted line, indicating that the residuals do not conform to a normal distribution.

**Table S1.** Estimates, standard errors, and p-values of all coefficients for the multiple linear model of dust coarse fraction. The model includes the independent variables of wind conditions (i.e., wind speed and slope under three wind direction types), time of day, season, year, soil moisture, and soil texture. The symbols of coefficients are defined in Eq. (3). The significantly positive, significantly negative, and insignificant coefficients at a confidence level of 95% (p-value > 0.05) are marked with orange, blue, and grey backgrounds, respectively.

| <b>Terms and coefficients</b>                        | <b>Estimates</b> | <b>Standard errors</b> | <b>p-values</b> |
|------------------------------------------------------|------------------|------------------------|-----------------|
| Intercept ( $\beta_0$ )                              | 0.0753           | 0.1574                 | 0.6323          |
| wind speed ( $\beta_1$ )                             | 0.0075           | 0.0002                 | <0.0001         |
| slope with uphill winds ( $\beta_2$ )                | 0.0175           | 0.0013                 | <0.0001         |
| slope with tangential winds ( $\beta_3$ )            | 0.0081           | 0.0015                 | <0.0001         |
| slope with downhill winds ( $\beta_4$ )              | 0.0076           | 0.0016                 | <0.0001         |
| time of day (“afternoon” as reference) ( $\beta_5$ ) |                  |                        |                 |
| evening                                              | -0.0339          | 0.0006                 | <0.0001         |
| morning                                              | -0.0253          | 0.0006                 | <0.0001         |
| season (“DJF” as reference) ( $\beta_6$ )            |                  |                        |                 |
| JJA                                                  | 0.0139           | 0.0008                 | <0.0001         |
| MAM                                                  | 0.0184           | 0.0007                 | <0.0001         |
| SON                                                  | 0.0124           | 0.0008                 | <0.0001         |
| year ( $\beta_7$ )                                   | 0.0002           | 0.0001                 | 0.0180          |
| soil moisture ( $\beta_8$ )                          | -0.0742          | 0.0030                 | <0.0001         |
| soil texture (“sand” as reference) ( $\beta_9$ )     |                  |                        |                 |
| loamy sand                                           | -0.0064          | 0.0014                 | <0.0001         |
| sandy loam                                           | 0.0106           | 0.0013                 | <0.0001         |
| loam                                                 | 0.0151           | 0.0011                 | <0.0001         |
| sandy clay loam                                      | 0.0204           | 0.0025                 | <0.0001         |
| clay loam                                            | 0.0393           | 0.0036                 | <0.0001         |
| clay                                                 | 0.0841           | 0.0064                 | <0.0001         |
| organic materials                                    | -0.0019          | 0.0042                 | 0.6570          |
| bedrock                                              | 0.0179           | 0.0019                 | <0.0001         |

**Table S2.** Estimates, standard errors, and p-values of all coefficients for the multiple linear model of dust coarse fraction. The model includes the independent variables of wind conditions (i.e, wind speed and slope under three wind direction types), time of day, season, year, soil moisture, and soil texture, as well as significant interaction terms between wind conditions and other independent variables. The interaction coefficients represent wind conditions (speed and direction) under various situation of time of day, season, and soil moisture. The symbols of coefficients are defined in Eq. (3) and (4). The significantly positive, significantly negative, and insignificant coefficients at a confidence level of 95% (p-value > 0.05) are marked with orange, blue, and grey backgrounds, respectively.

| Multiple linear model coefficients for wind speed under various conditions                  |           |                 |          |
|---------------------------------------------------------------------------------------------|-----------|-----------------|----------|
|                                                                                             | Estimates | Standard errors | p-values |
| Afternoon, DJF, and soil moisture of 0 (reference levels; $\beta_1$ )                       | 0.0076    | 0.0007          | <0.0001  |
| Adjustments with time of day ( $\beta_{15}$ )                                               |           |                 |          |
| evening                                                                                     | 0.0122    | 0.0006          | <0.0001  |
| morning                                                                                     | 0.0016    | 0.0006          | 0.0058   |
| Adjustments with season ( $\beta_{16}$ )                                                    |           |                 |          |
| JJA                                                                                         | -0.0028   | 0.0007          | <0.0001  |
| MAM                                                                                         | -0.0023   | 0.0006          | 0.0003   |
| SON                                                                                         | -0.0003   | 0.0007          | 0.6500   |
| Adjustments with soil moisture ( $\beta_{18}$ )                                             | -0.0154   | 0.0029          | <0.0001  |
| Multiple linear model coefficients for slope with uphill winds under various conditions     |           |                 |          |
|                                                                                             | Estimates | Standard errors | p-values |
| Afternoon, DJF, and soil moisture of 0 (reference levels; $\beta_2$ )                       | 0.0135    | 0.0030          | <0.0001  |
| Adjustments with time of day ( $\beta_{25}$ )                                               |           |                 |          |
| evening                                                                                     | 0.0061    | 0.0024          | 0.0118   |
| morning                                                                                     | 0.0159    | 0.0026          | <0.0001  |
| Adjustments with season ( $\beta_{26}$ )                                                    |           |                 |          |
| JJA                                                                                         | -0.0098   | 0.0028          | 0.0005   |
| MAM                                                                                         | -0.0138   | 0.0029          | <0.0001  |
| SON                                                                                         | -0.0056   | 0.0031          | 0.0672   |
| Adjustments with soil moisture ( $\beta_{28}$ )                                             | 0.0521    | 0.0107          | <0.0001  |
| Multiple linear model coefficients for slope with tangential winds under various conditions |           |                 |          |
|                                                                                             | Estimates | Standard errors | p-values |
| Afternoon, soil moisture of 0 (reference levels; $\beta_3$ )                                | -0.0038   | 0.0025          | 0.1261   |
| Adjustments with time of day ( $\beta_{35}$ )                                               |           |                 |          |
| evening                                                                                     | 0.0134    | 0.0024          | <0.0001  |
| morning                                                                                     | 0.0110    | 0.0027          | <0.0001  |
| Adjustments with soil moisture ( $\beta_{38}$ )                                             | 0.0351    | 0.0115          | 0.0022   |
| Multiple linear model coefficients for slope with downhill winds under various conditions   |           |                 |          |
|                                                                                             | Estimates | Standard errors | p-values |
| DJF (reference level; $\beta_4$ )                                                           | 0.0148    | 0.0026          | <0.0001  |
| Adjustments with season ( $\beta_{46}$ )                                                    |           |                 |          |
| JJA                                                                                         | -0.0101   | 0.0031          | 0.0011   |

|                                                      |           |                 |          |
|------------------------------------------------------|-----------|-----------------|----------|
| MAM                                                  | -0.0105   | 0.0032          | 0.0011   |
| SON                                                  | -0.0090   | 0.0036          | 0.0116   |
| Other coefficients                                   |           |                 |          |
|                                                      | Estimates | Standard errors | p-values |
| Intercept ( $\beta_0$ )                              | 0.0703    | 0.1560          | 0.6522   |
| time of day (“afternoon” as reference) ( $\beta_5$ ) |           |                 |          |
| evening                                              | -0.1210   | 0.0044          | <0.0001  |
| morning                                              | -0.0415   | 0.0042          | <0.0001  |
| season (“DJF” as reference) ( $\beta_6$ )            |           |                 |          |
| JJA                                                  | 0.0360    | 0.0047          | <0.0001  |
| MAM                                                  | 0.0370    | 0.0045          | <0.0001  |
| SON                                                  | 0.0166    | 0.0053          | 0.0018   |
| year ( $\beta_7$ )                                   | 0.0002    | 0.0001          | 0.0149   |
| soil moisture ( $\beta_8$ )                          | 0.0156    | 0.0208          | 0.4528   |
| soil texture (“sand” as reference) ( $\beta_9$ )     |           |                 |          |
| loamy sand                                           | -0.0061   | 0.0014          | <0.0001  |
| sandy loam                                           | 0.0108    | 0.0013          | <0.0001  |
| loam                                                 | 0.0149    | 0.0011          | <0.0001  |
| sandy clay loam                                      | 0.0203    | 0.0025          | <0.0001  |
| clay loam                                            | 0.0391    | 0.0035          | <0.0001  |
| clay                                                 | 0.0846    | 0.0063          | <0.0001  |
| organic materials                                    | -0.0024   | 0.0042          | 0.5634   |
| bedrock                                              | 0.0165    | 0.0019          | <0.0001  |
